# Supplementary material
Source: PubMed Central journal article supplement (PMC2895381)
Supplement: mmc1.pdf [file mmc1.pdf]

Biophysical Journal, Volume 99

**Supporting Material**

**NMR Backbone Dynamics of VEK-30 Bound to the Human Plasminogen Kringle 2 Domain**

Min Wang, Mary Prorok, and Francis Castellino

**Supporting Material**

**NMR Backbone Dynamics of VEK-30 Bound to the Human Plasminogen Kringle 2 Domain**

Min Wang, Mary Prorok, and Francis J. Castellino

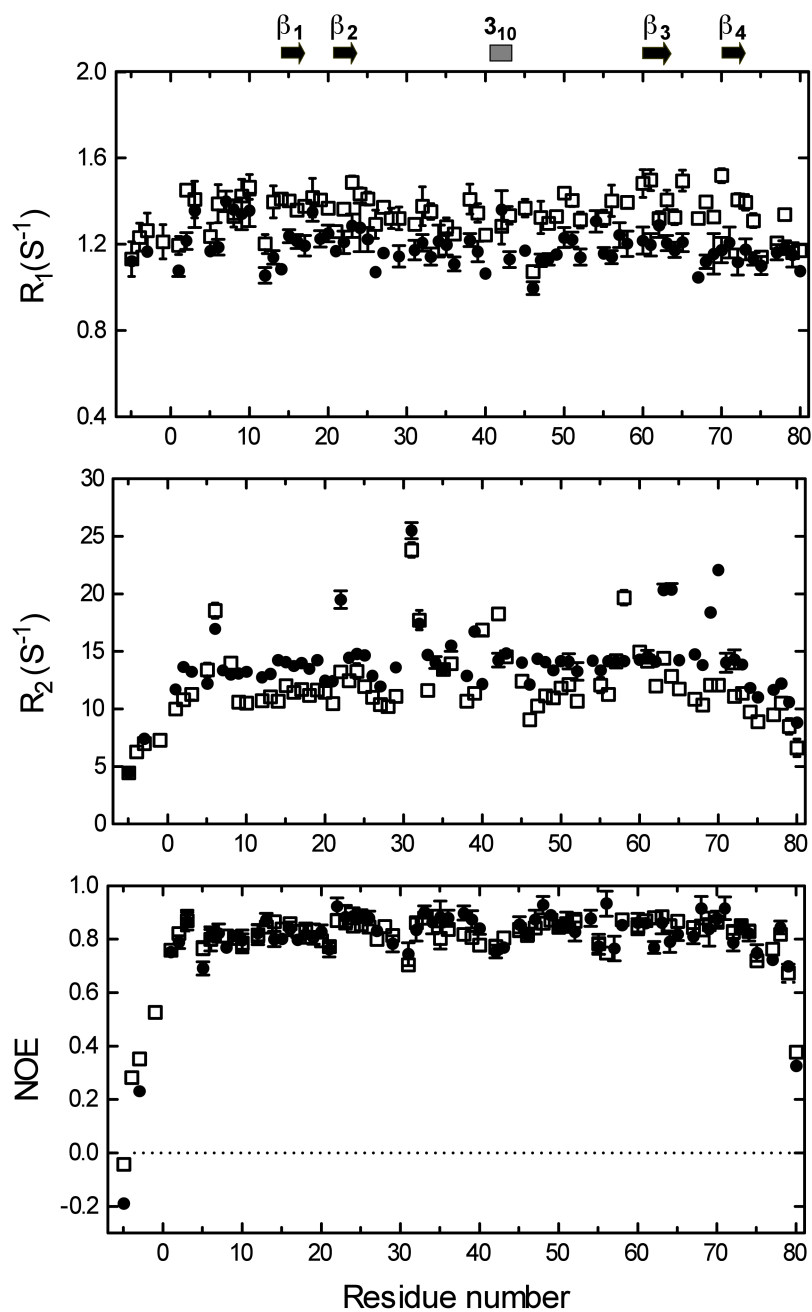

**FIGURE S1** Backbone  $^{15}N$  relaxation data of K2<sub>Pg</sub> both in the absence (open squares) and presence (filled circles) of VEK-30 plotted according to the amino acid sequence of K2<sub>Pg</sub>. Elements of secondary structure (top) are marked at the top of the diagrams (PDB entry 2KJ4).

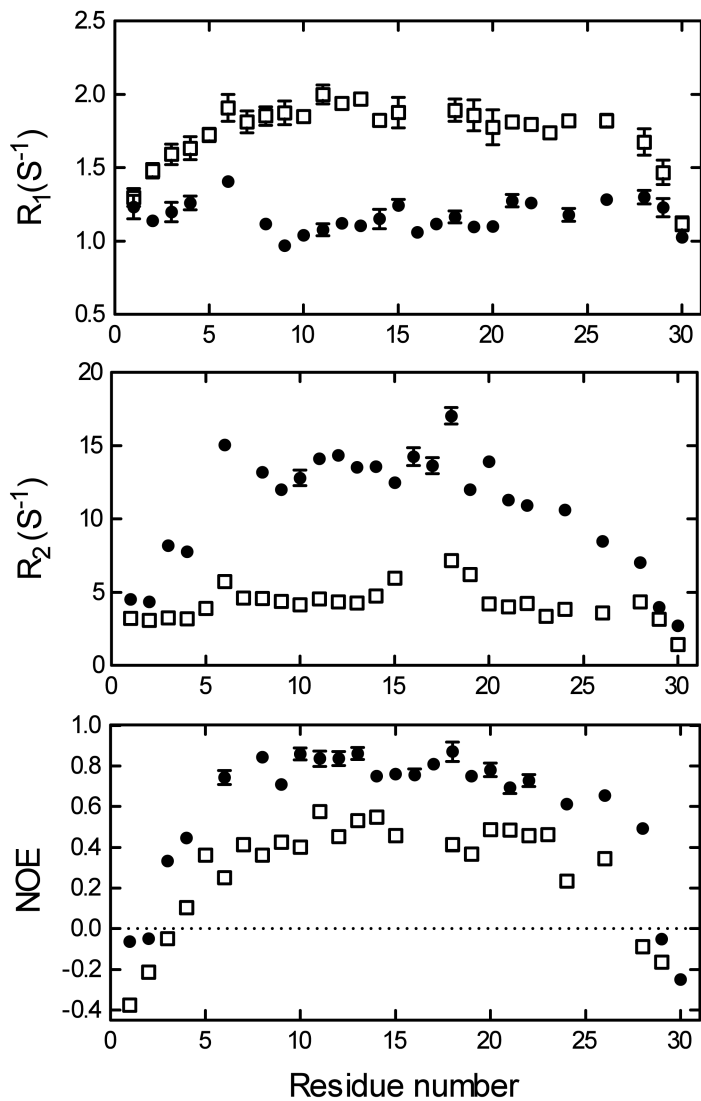

**FIGURE S2** Backbone <sup>15</sup>N relaxation data of VEK-30 both in the absence (open squares) and presence (filled circles) of K2<sub>Pg</sub> plotted according to the amino acid sequence of VEK-30.

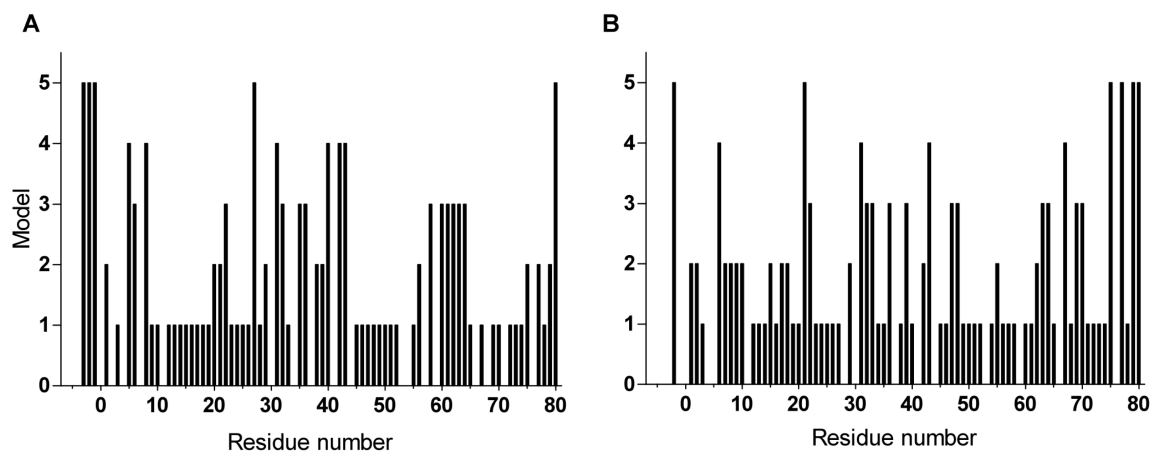

**FIGURE S3** Motional models used in the model-free analysis are plotted as a function of the residue numbers of K2<sub>pg</sub>, depicting the dynamics in the absence (A) and presence (B) of VEK-30.

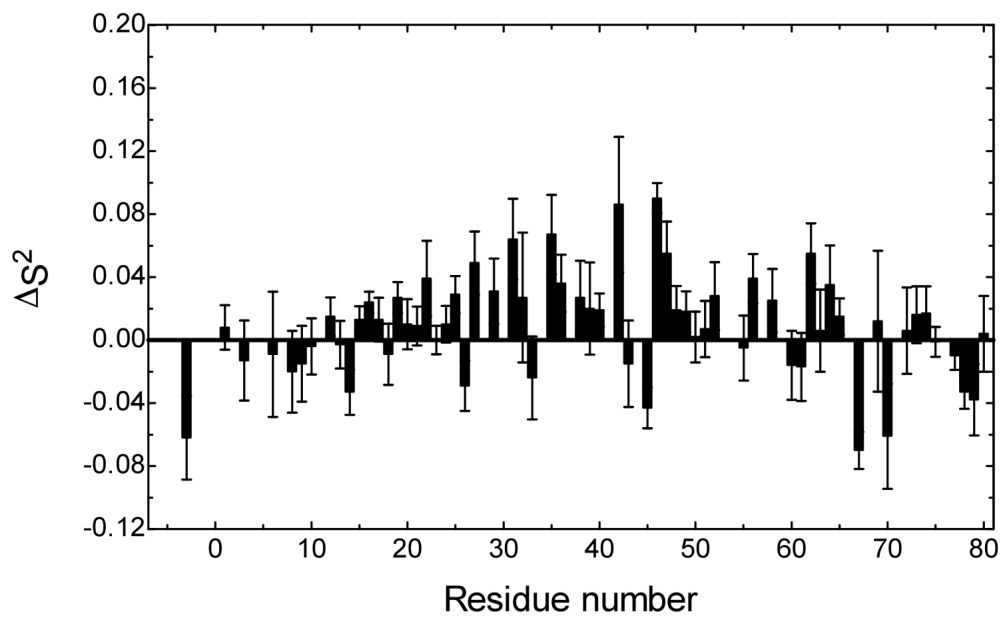

**FIGURE S4** Differences of the generalized order parameter ( $S^2$ ) between apo- $K2_{Pg}$  and VEK-30-complexed  $K2_{Pg}$ . A positive  $\Delta S^2$  denotes enhanced rigidity of the protein backbone upon binding.
